# Supplementary material for: IRF1 regulation of ZBP1 links mitochondrial DNA and chondrocyte damage in osteoarthritis
Source: Springer Nature journal article supplement (doi:10.1186/s12964-024-01744-1), 2024-07-18
Supplement: 12964_2024_1744_MOESM2_ESM.pdf [file 12964_2024_1744_MOESM2_ESM.pdf]

**Fig.1**

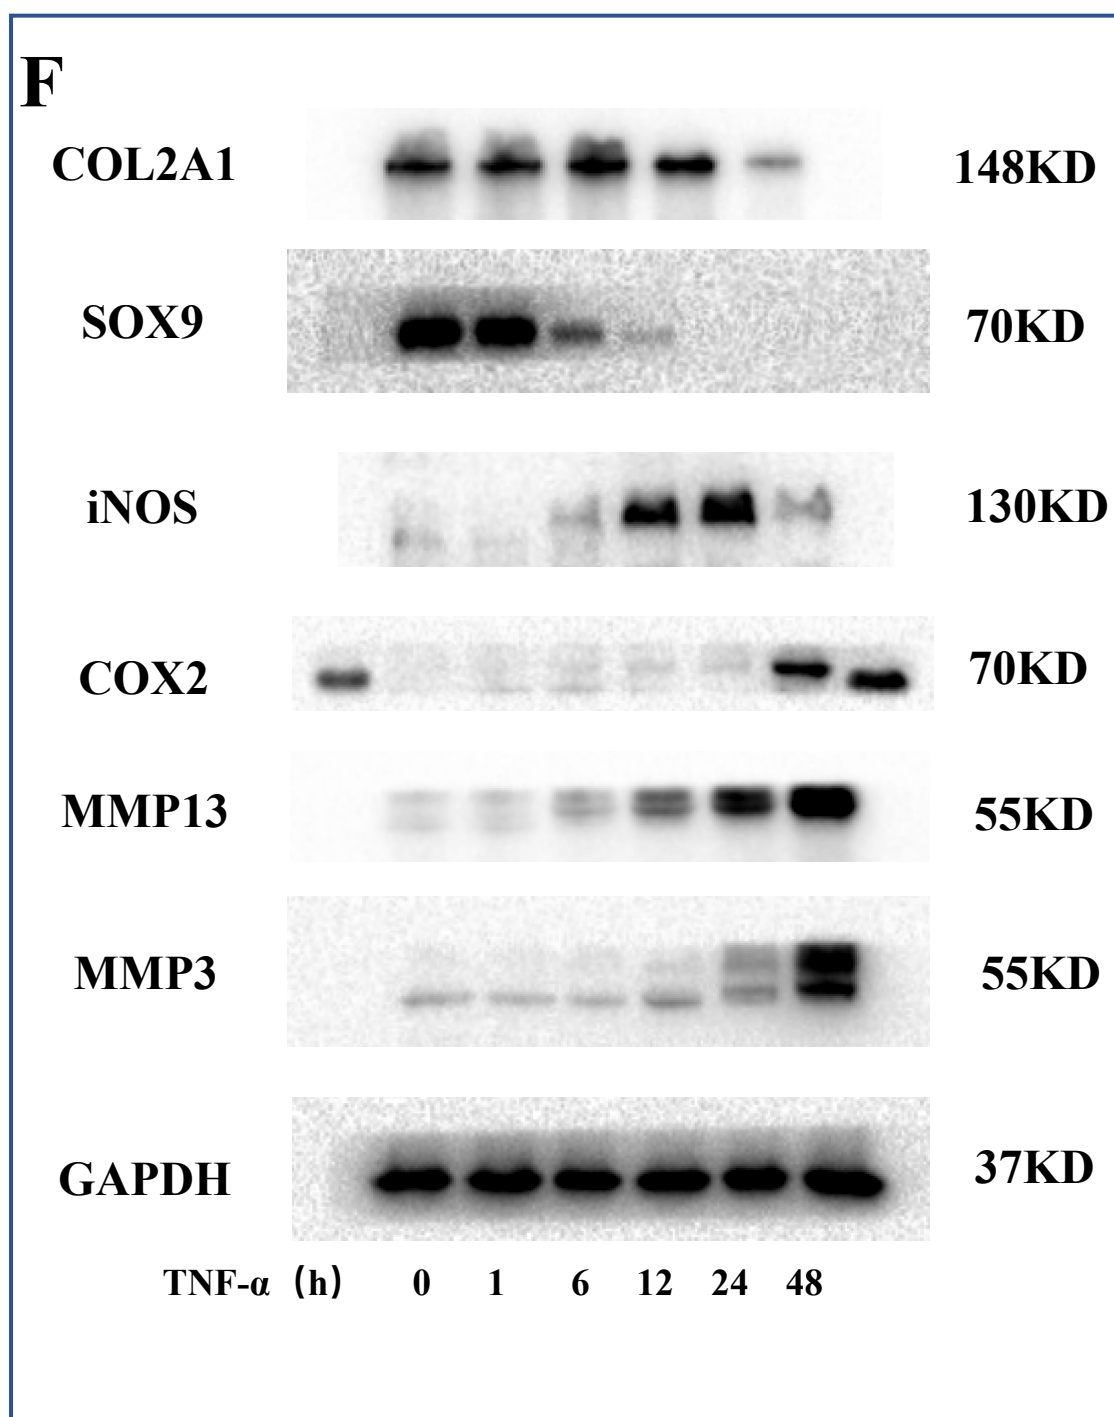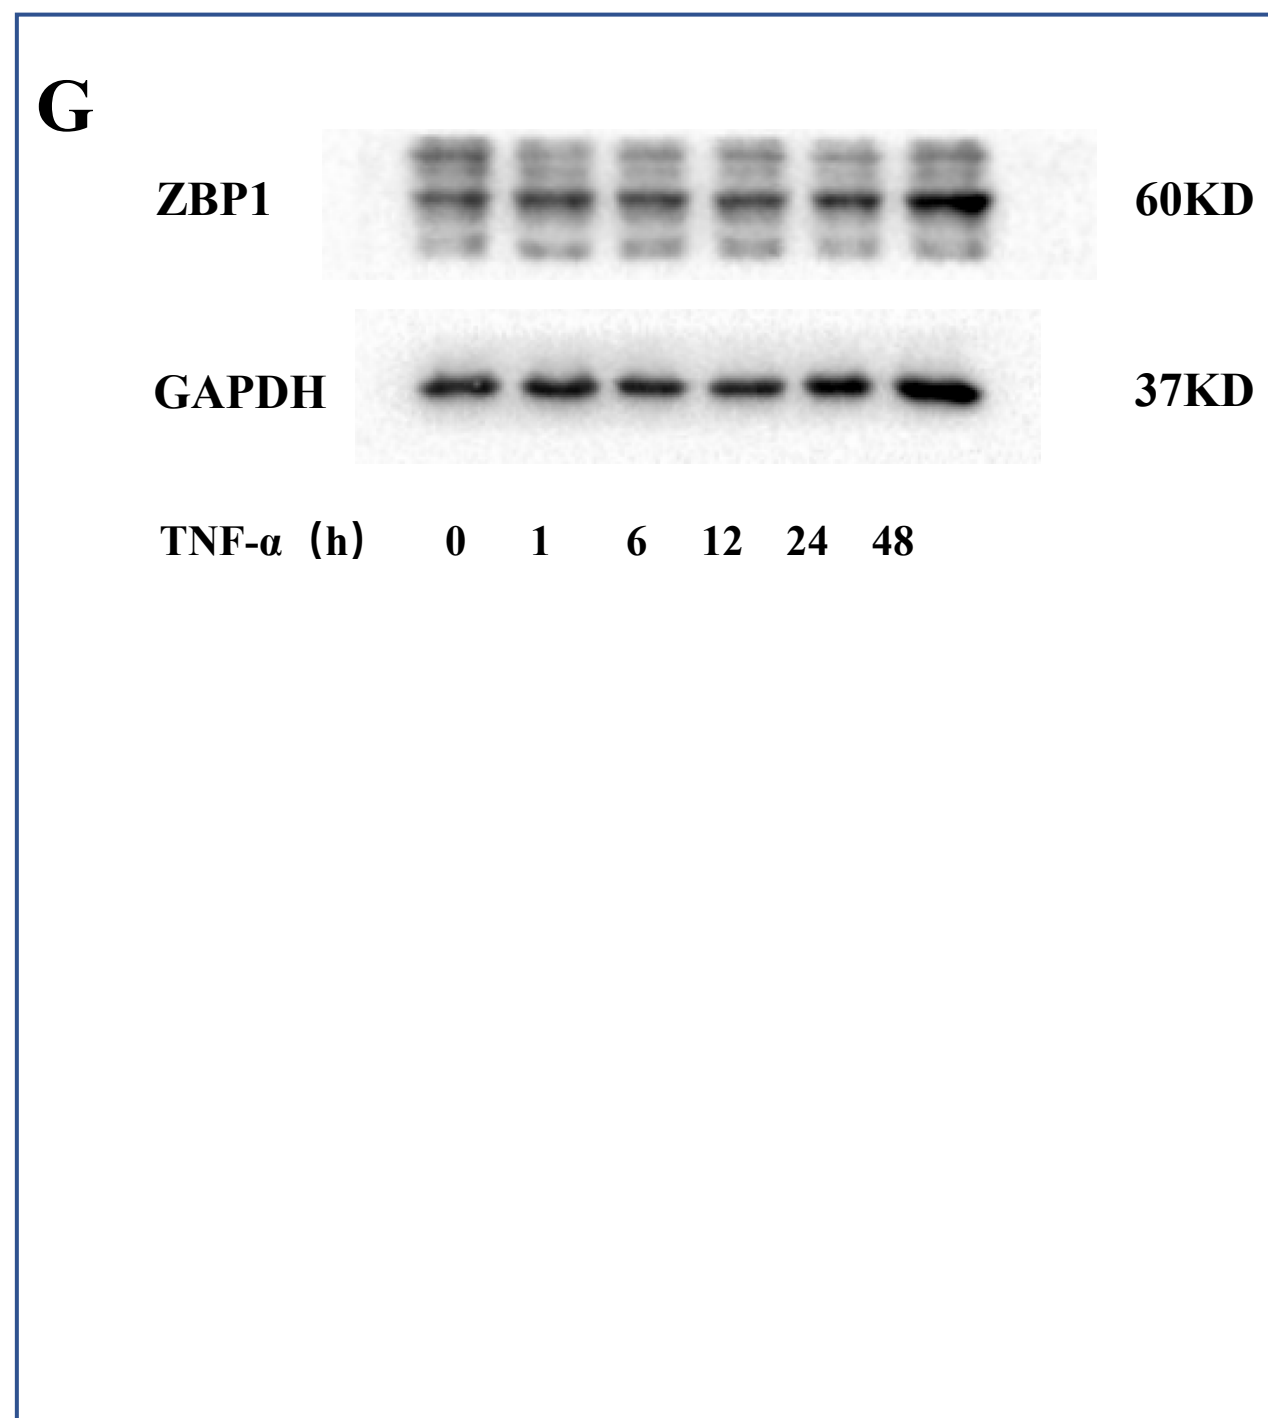

**Fig.2**

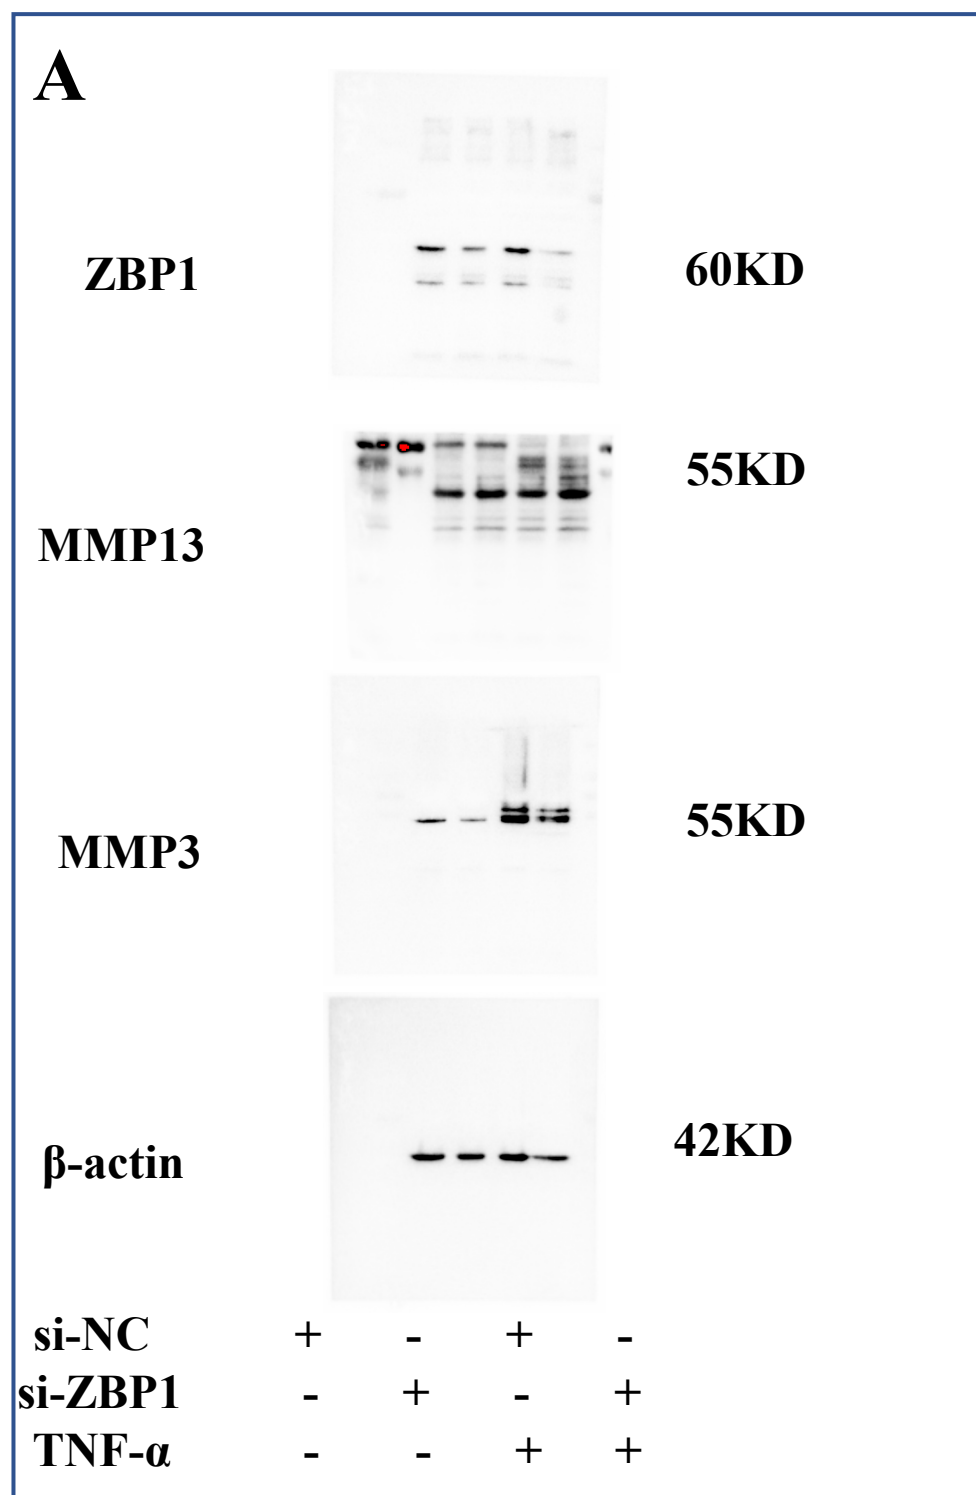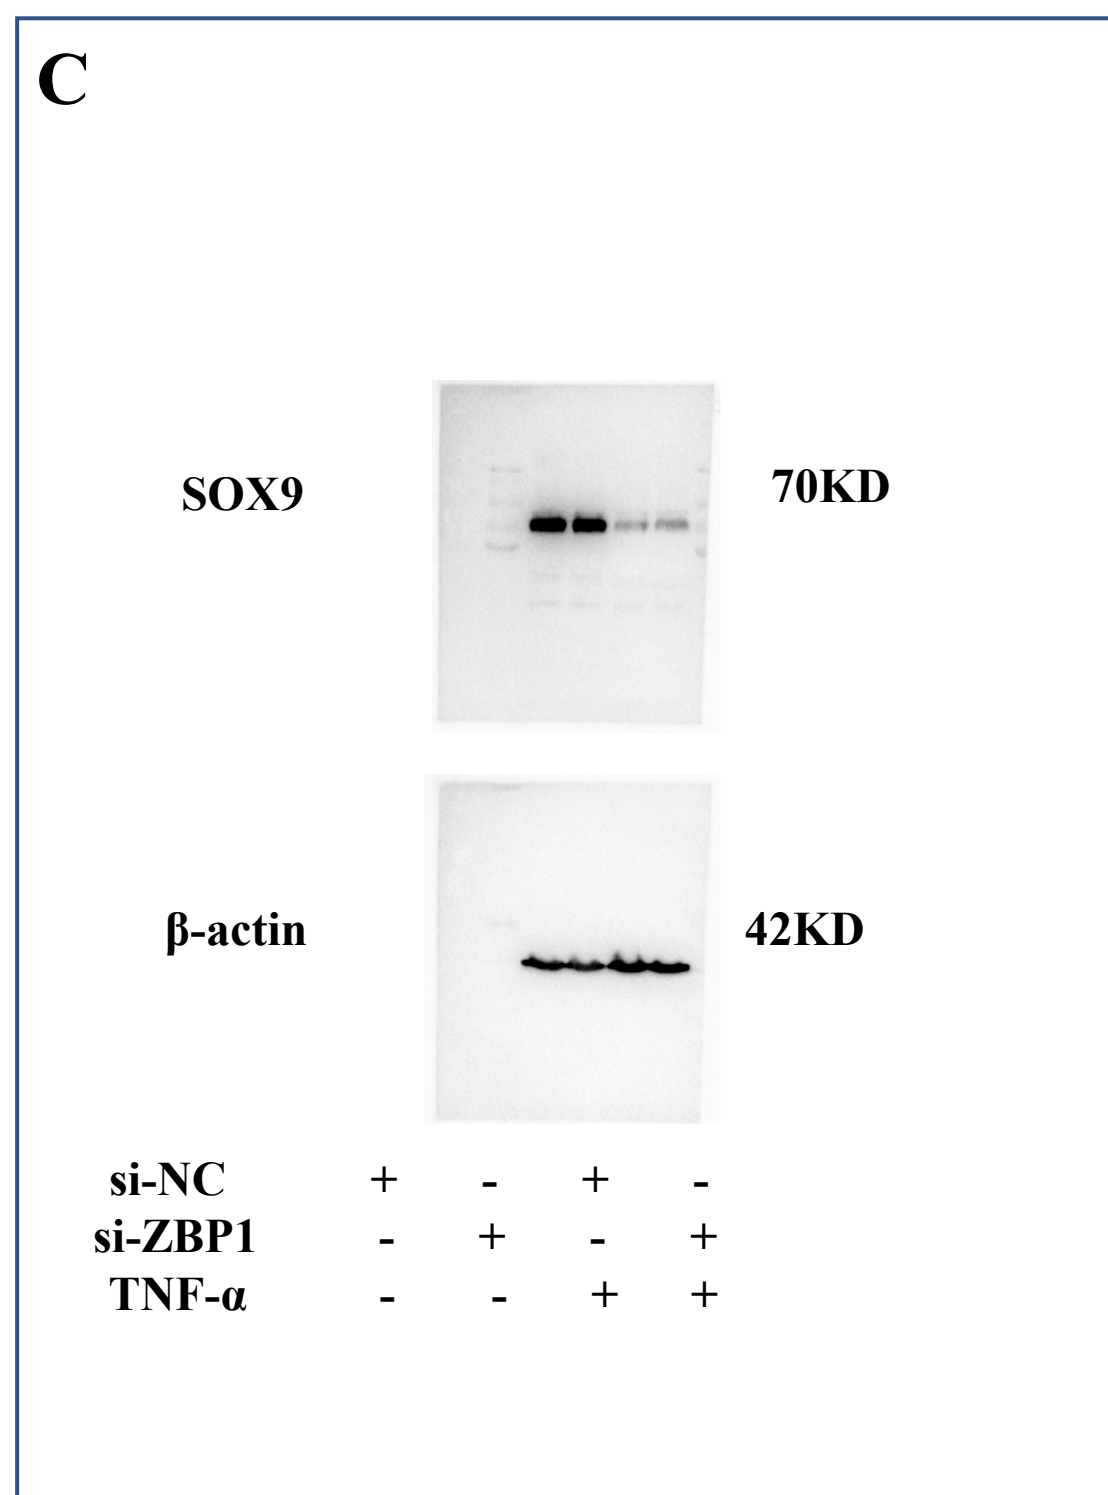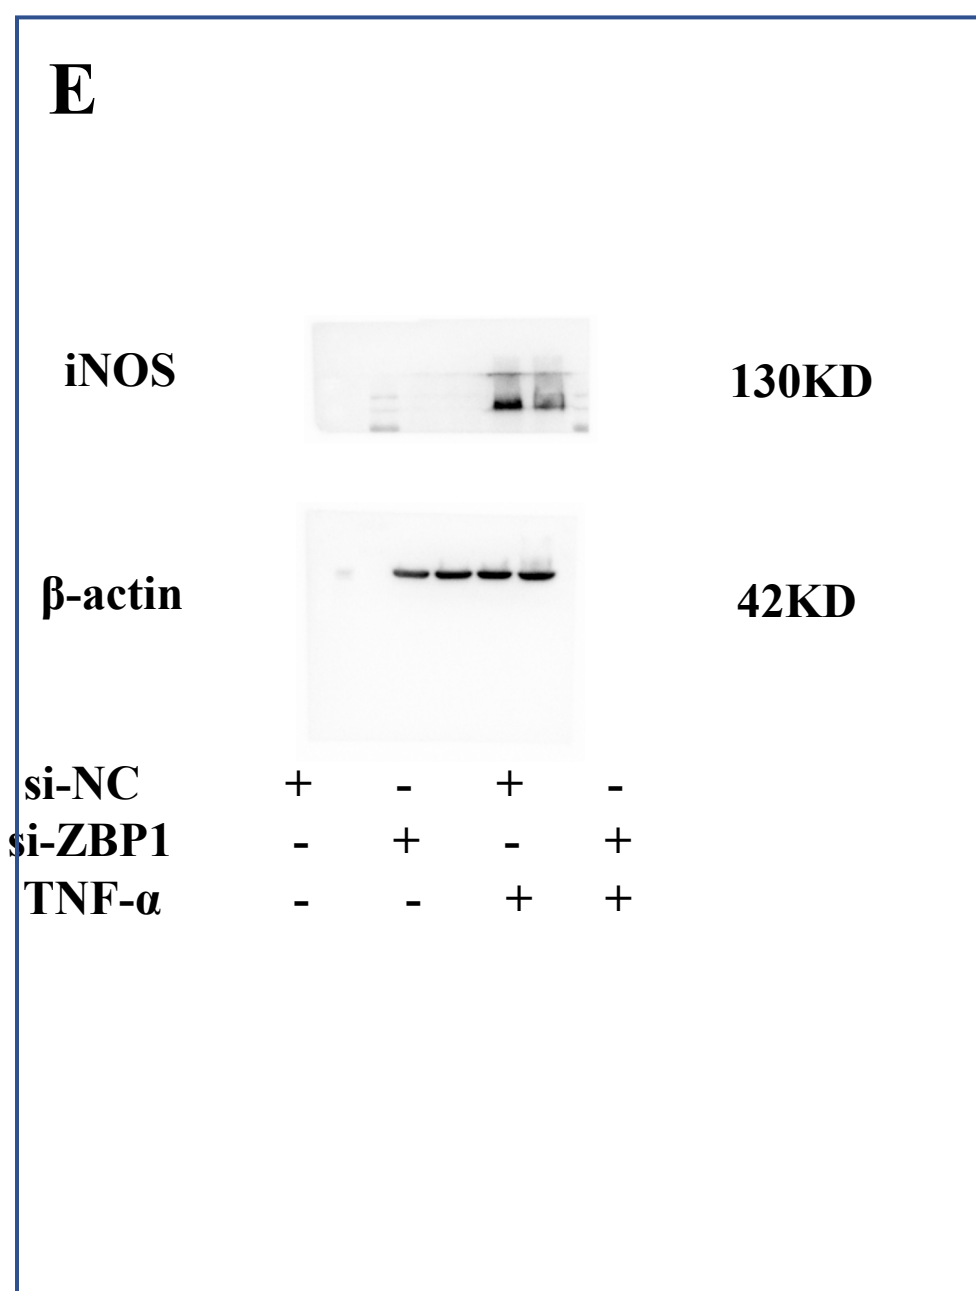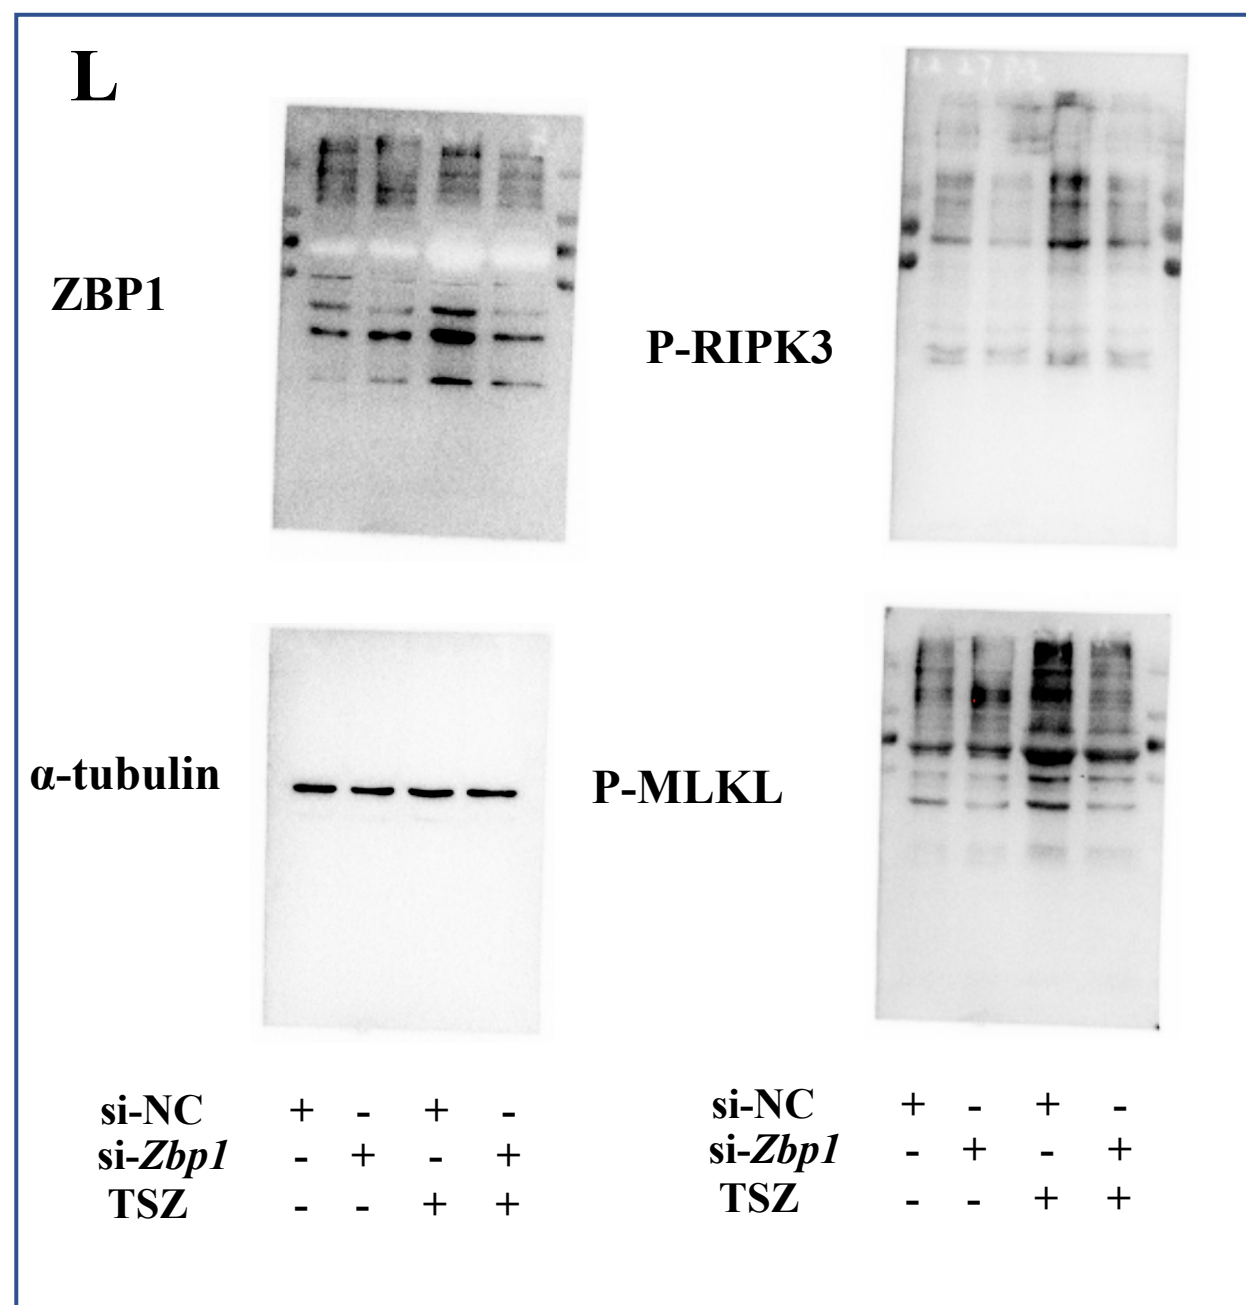

**Fig.4**

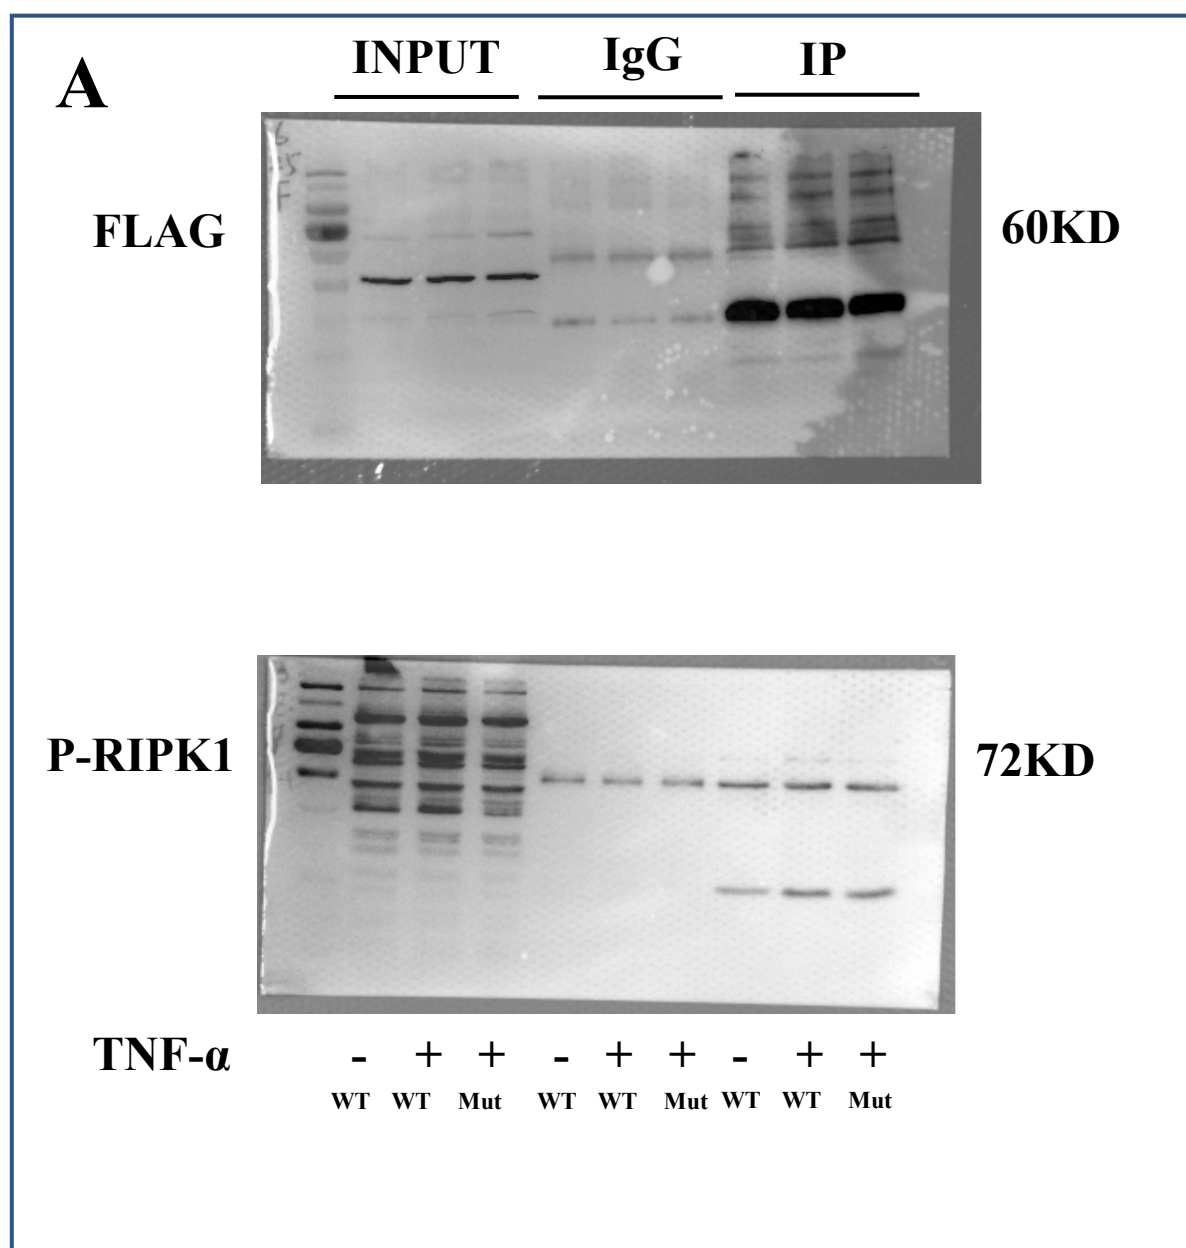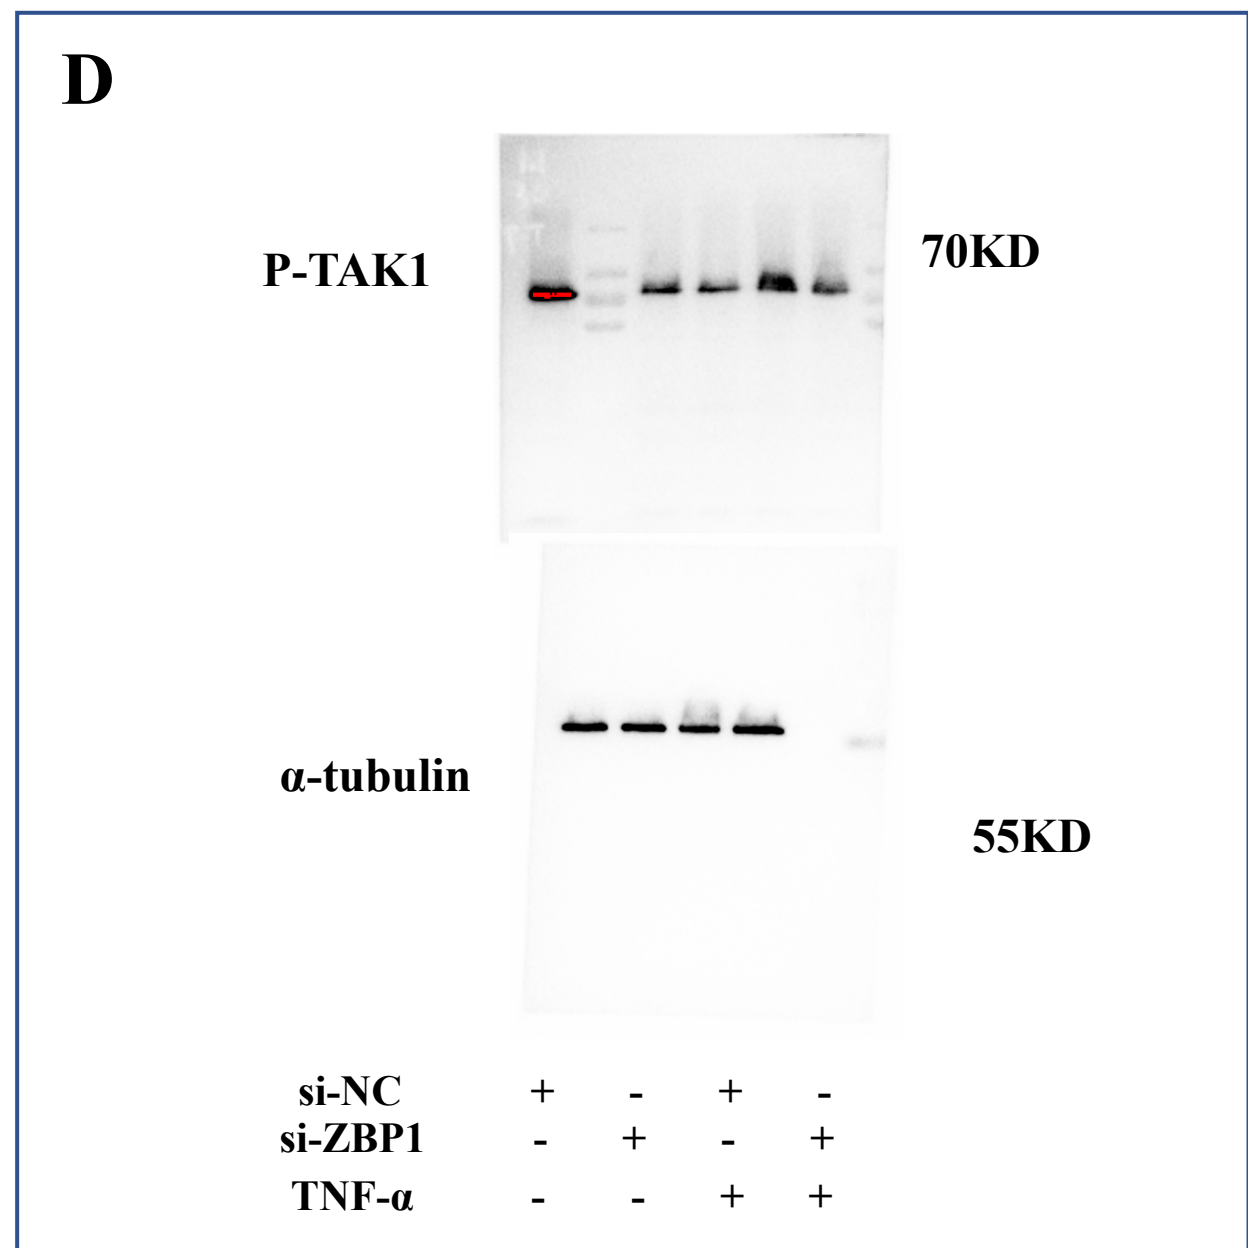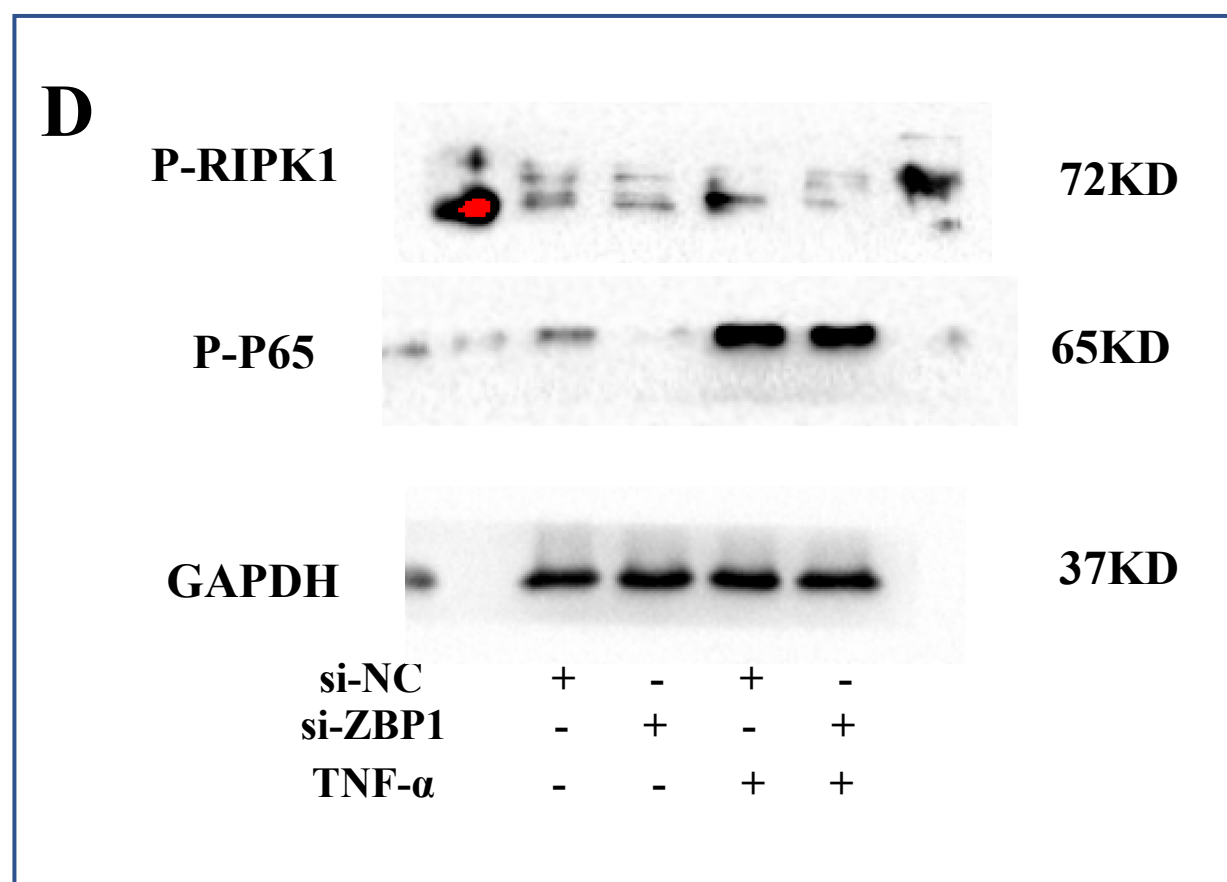

**Fig.5**

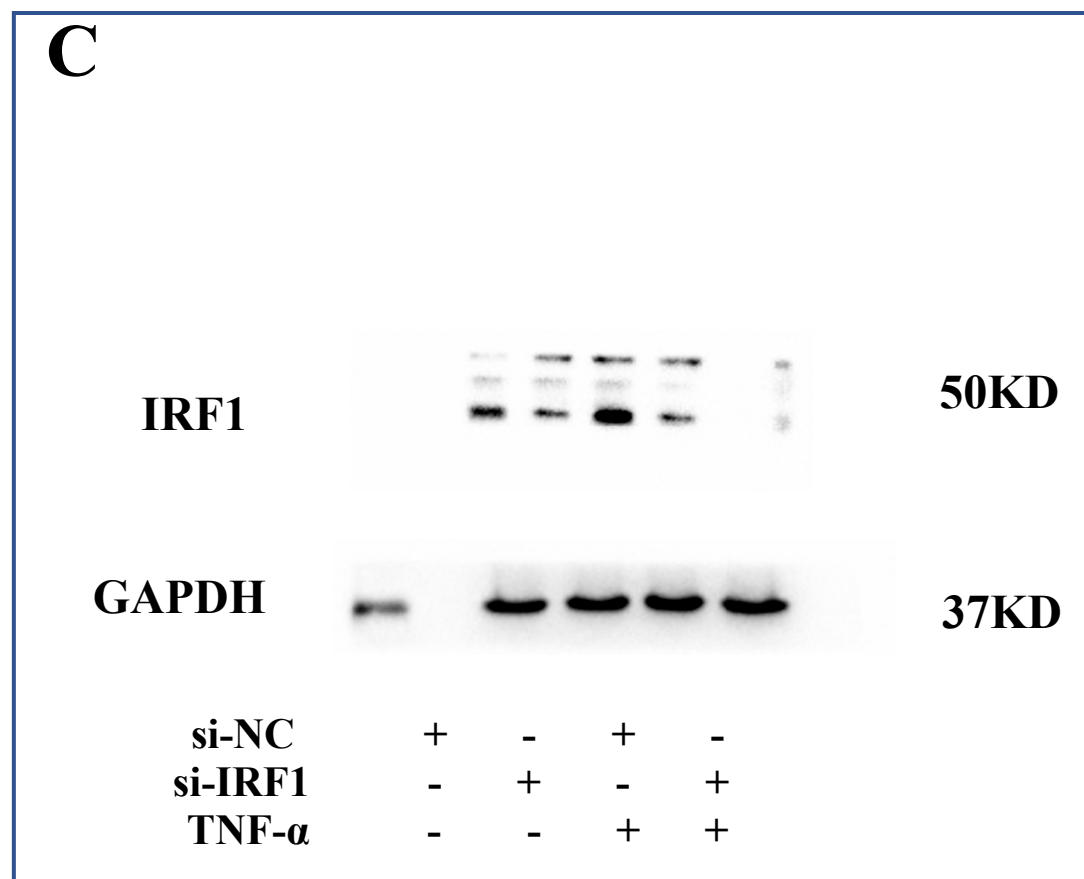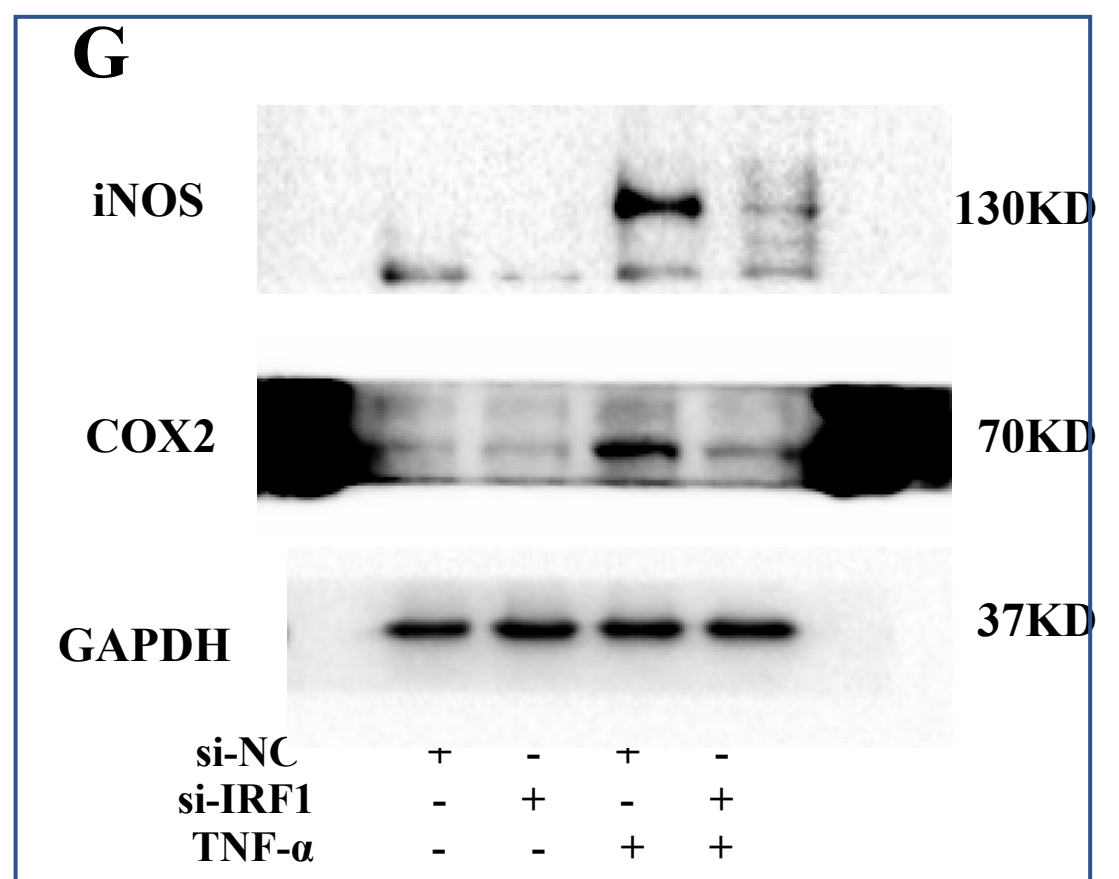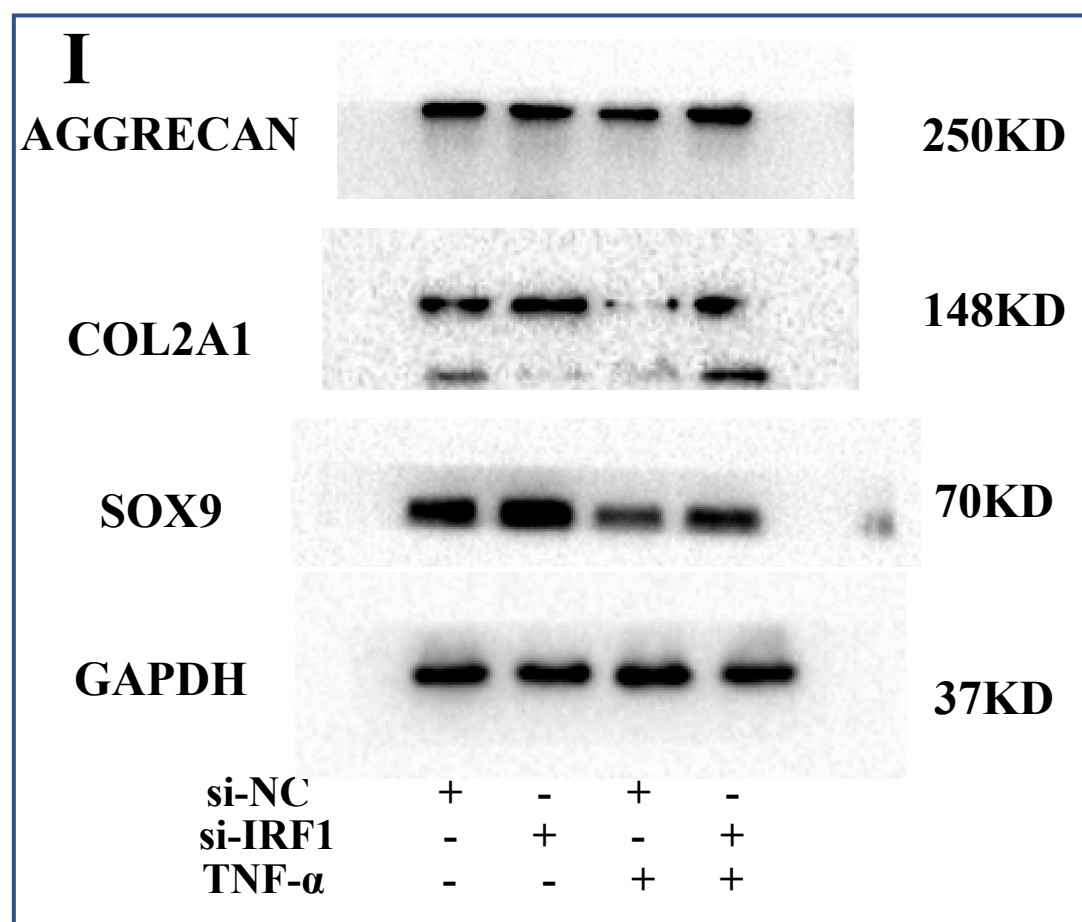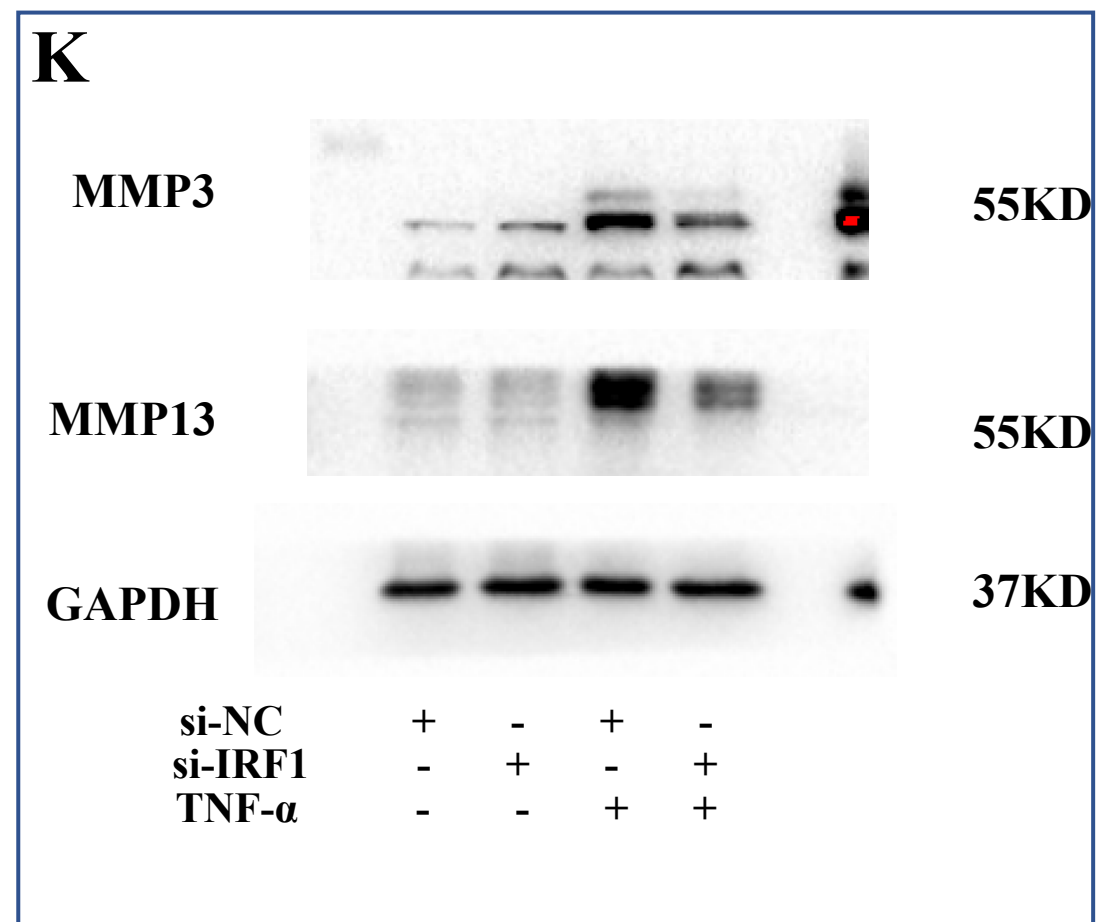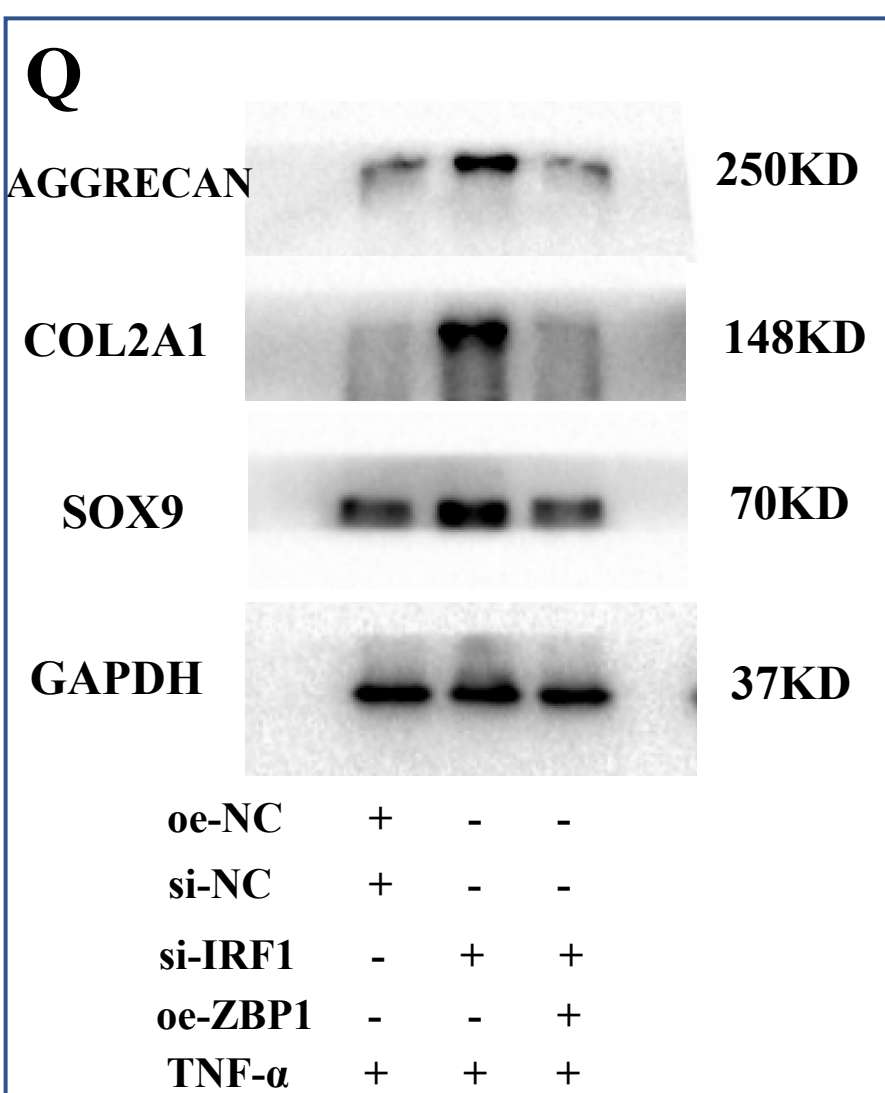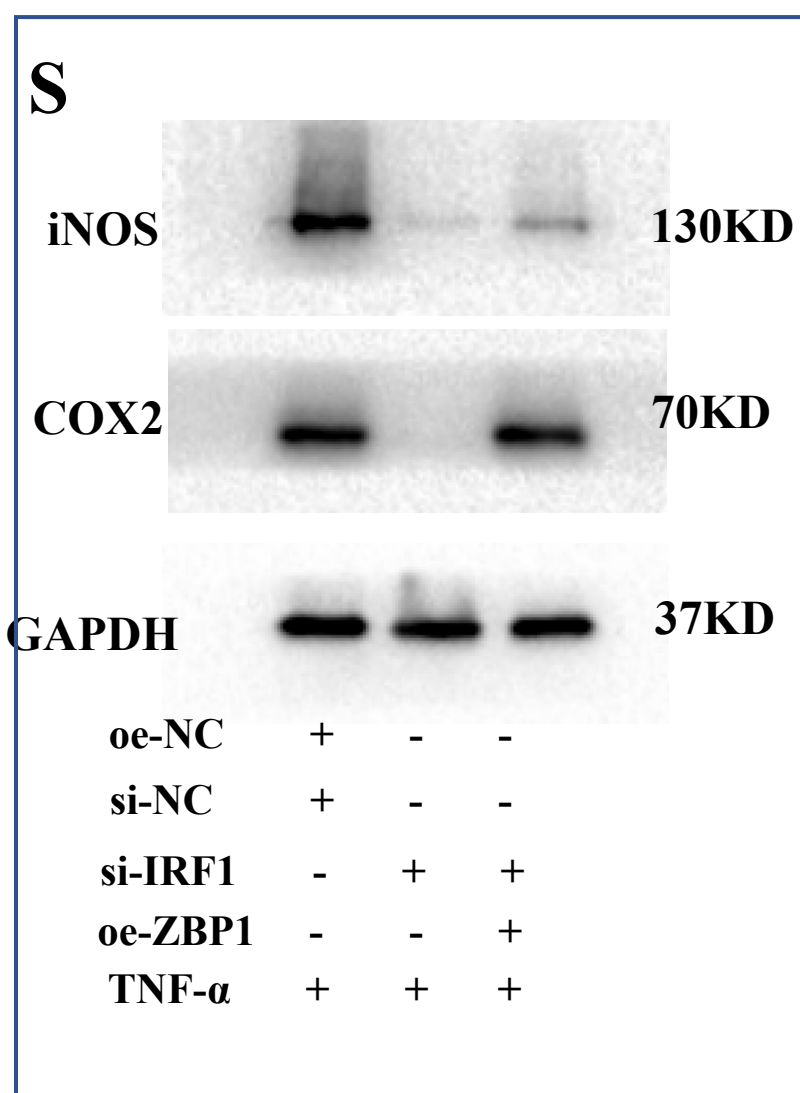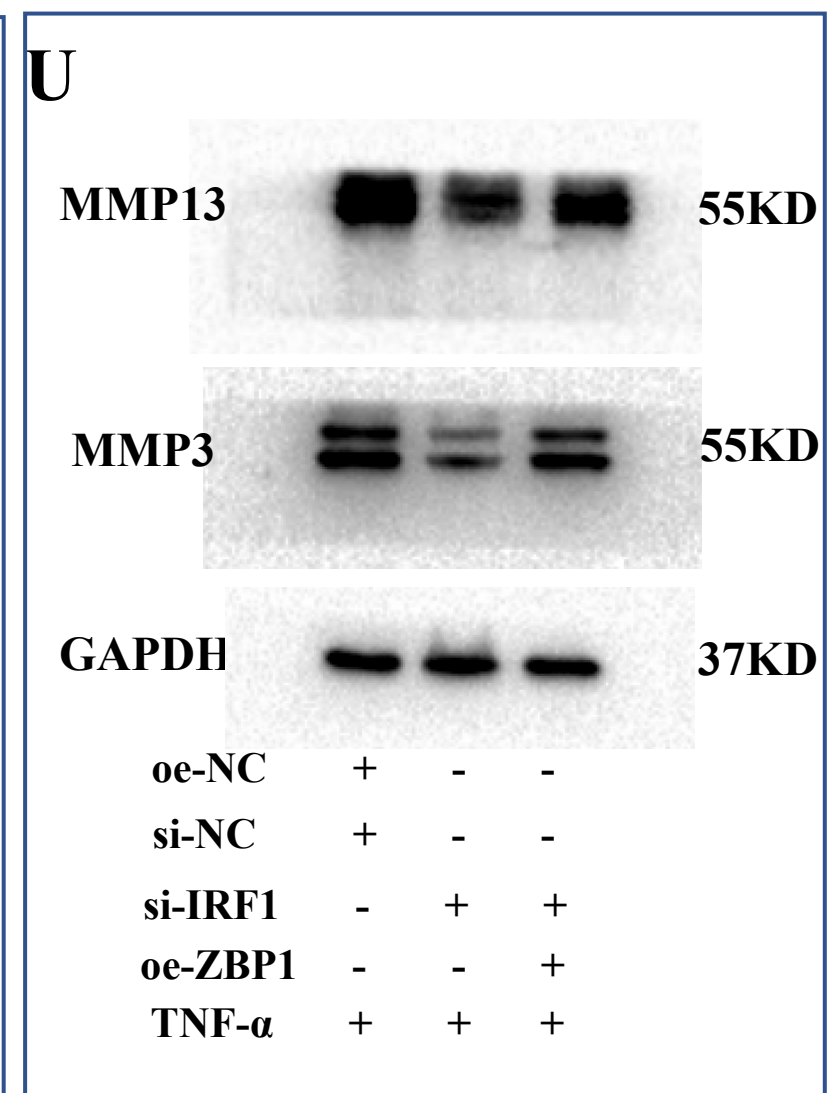

**Fig.7**

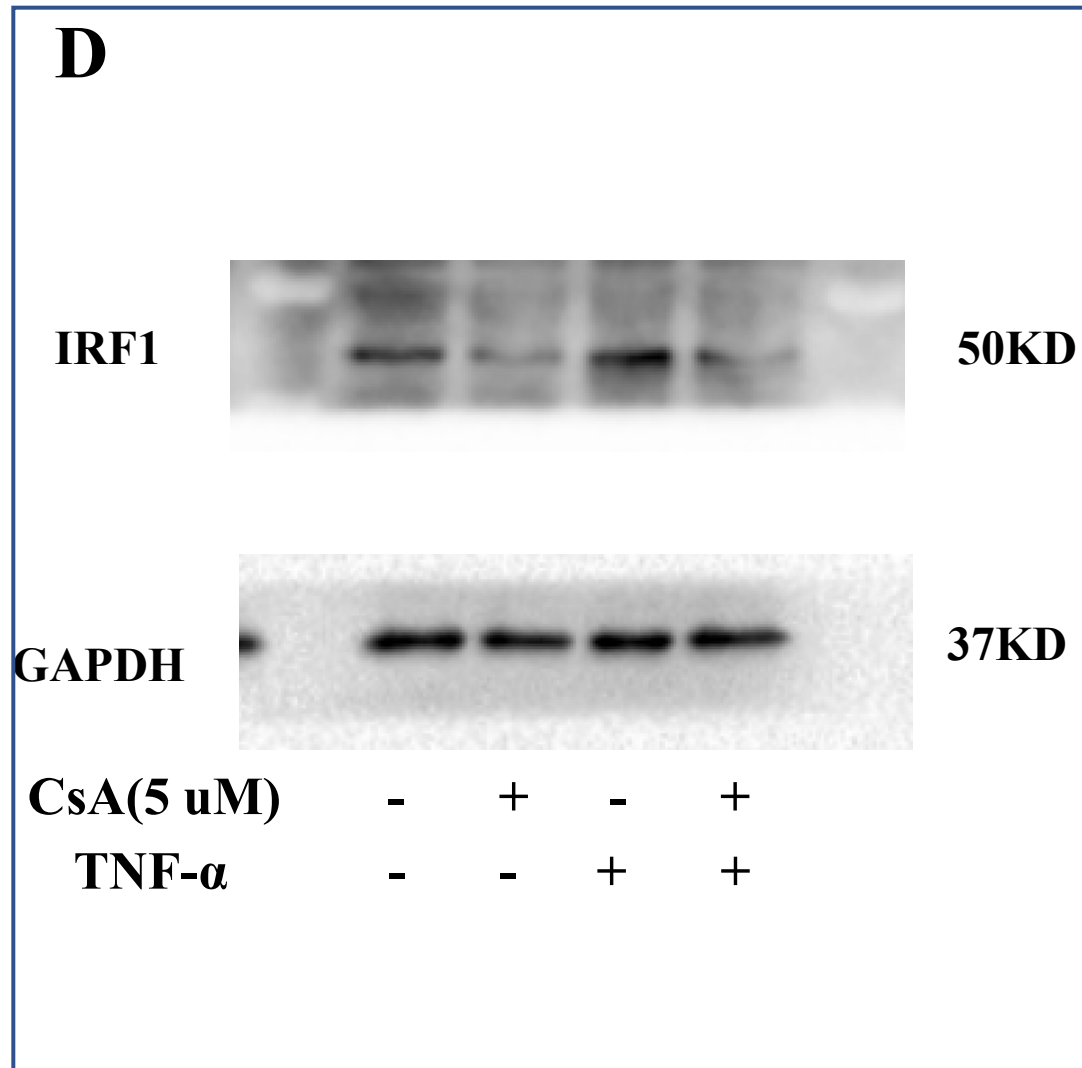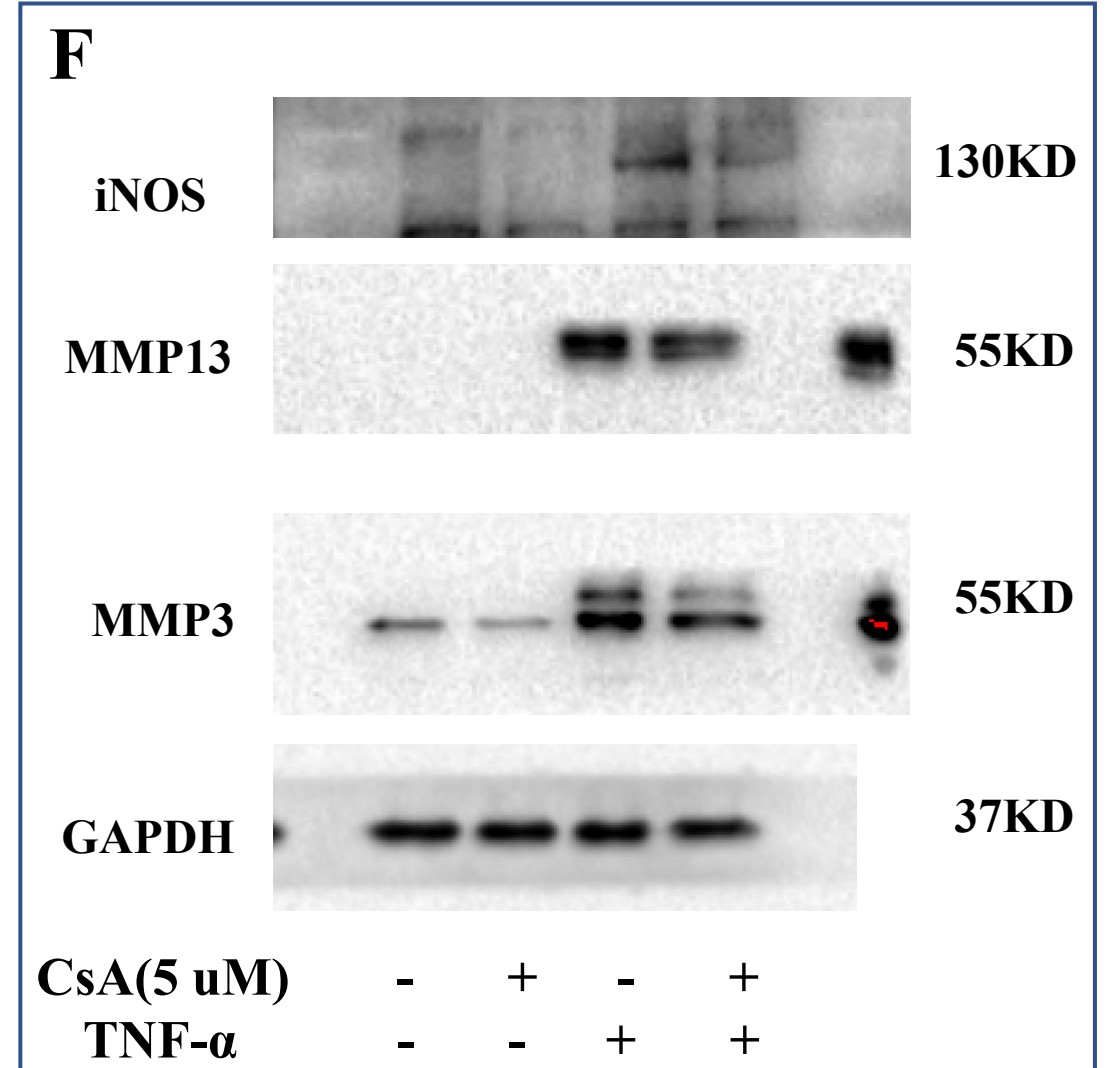



# Supplementary Fig.2

## A

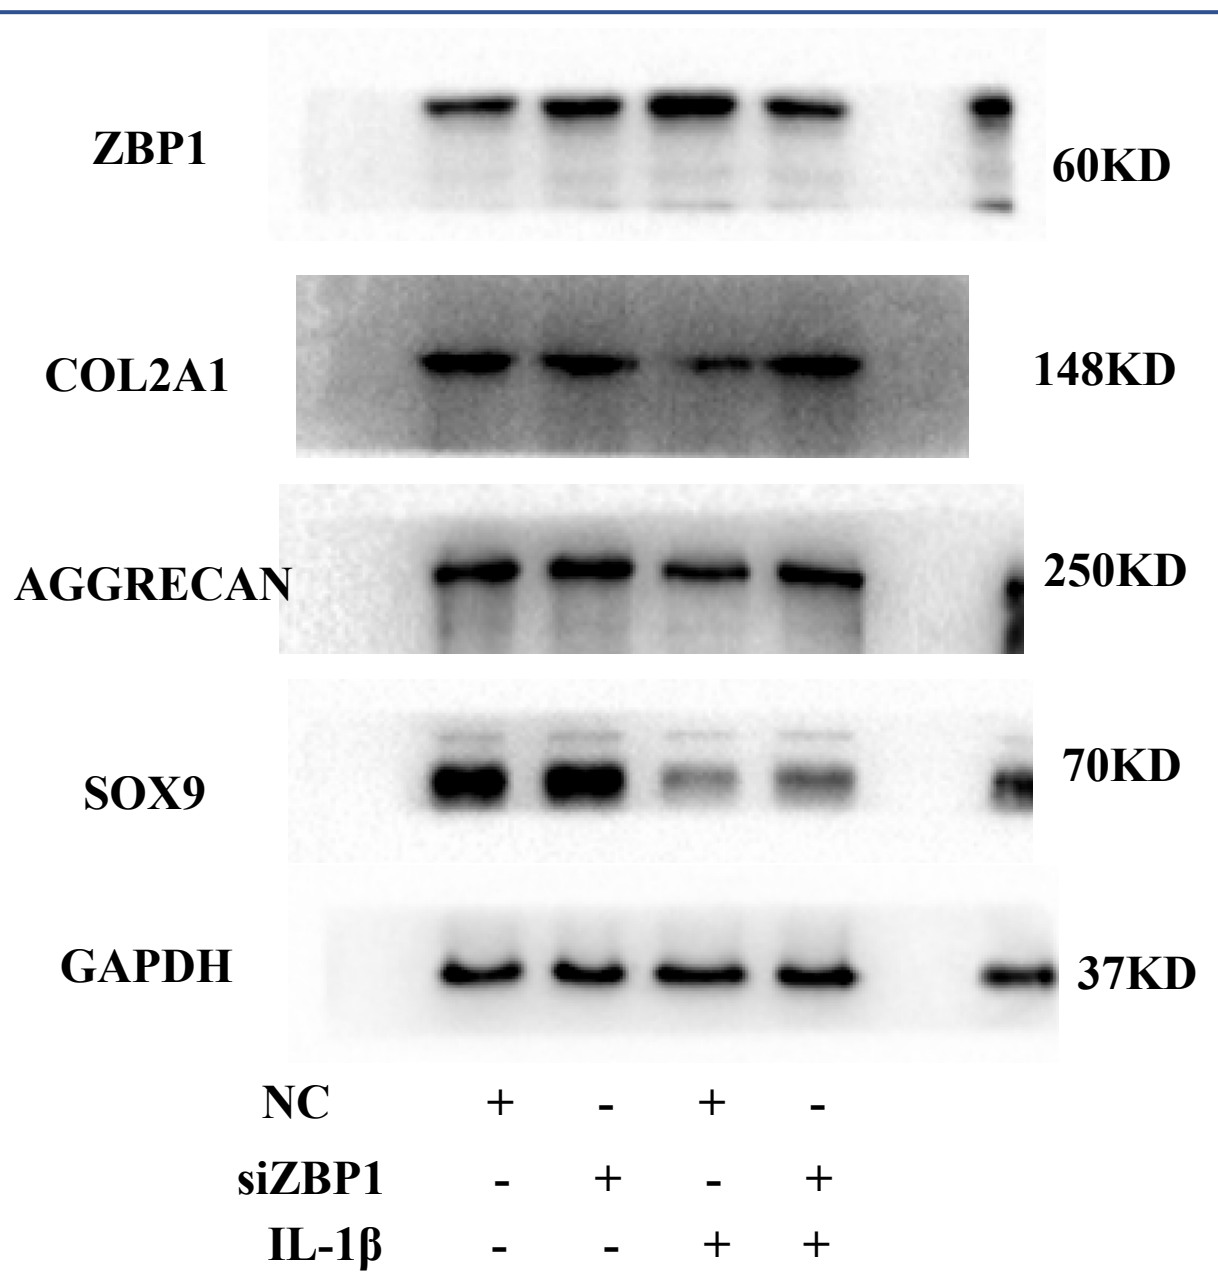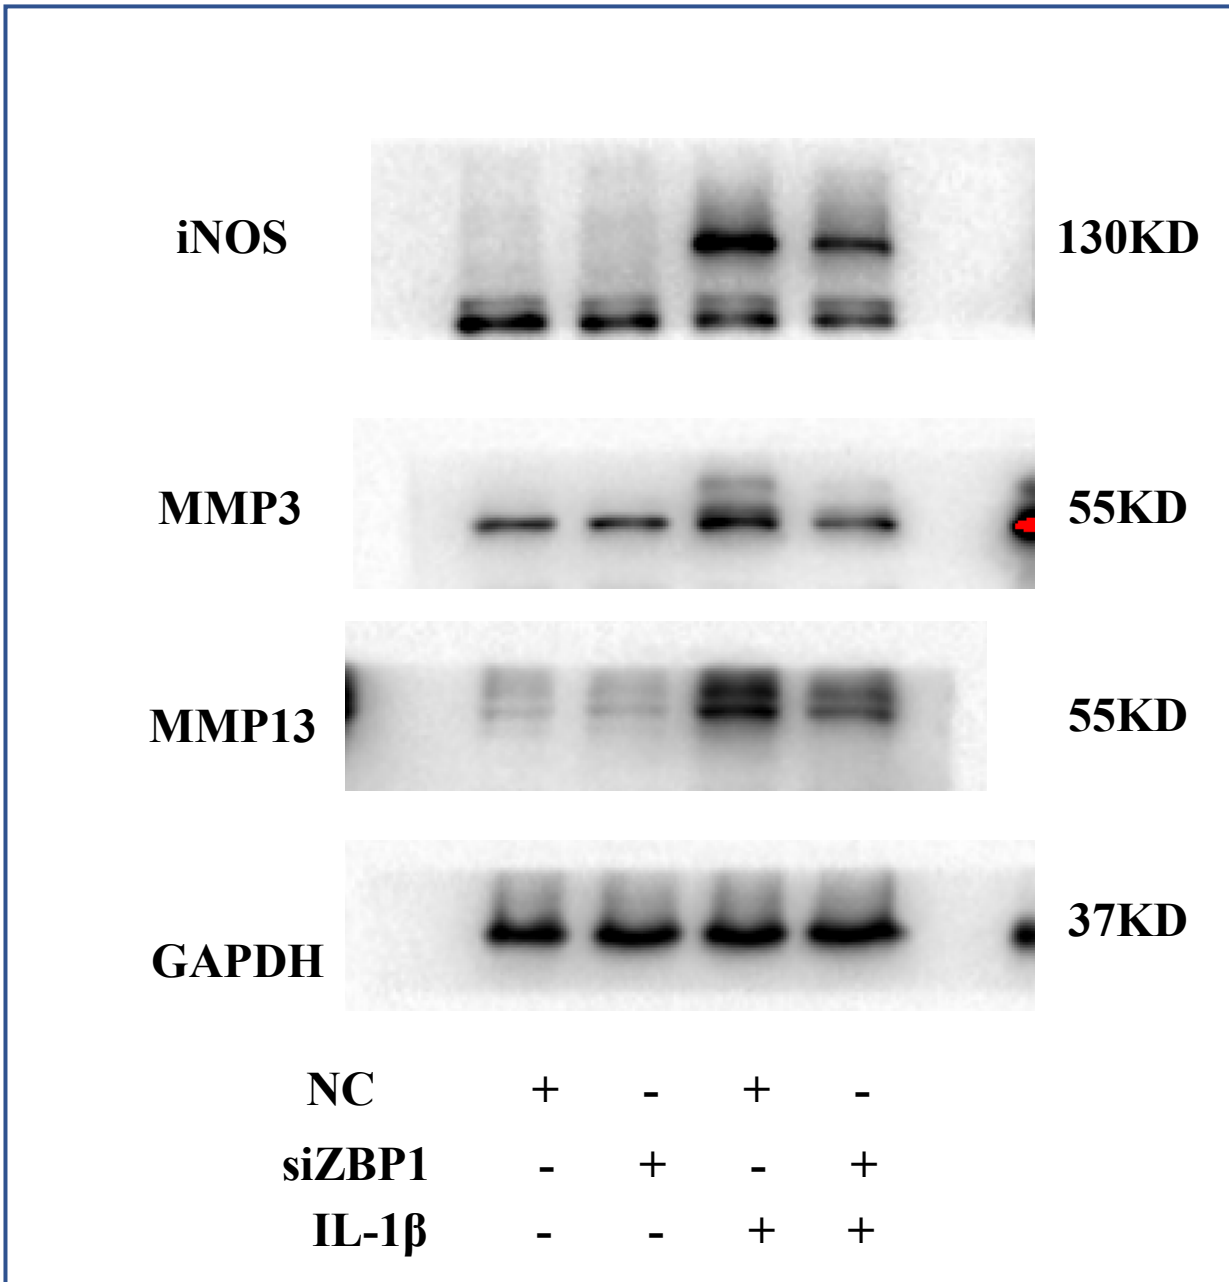

# Supplementary Fig.4

**A**

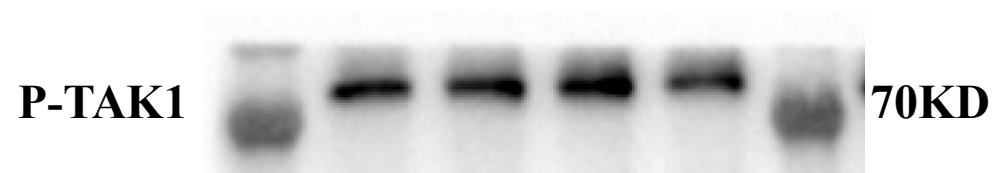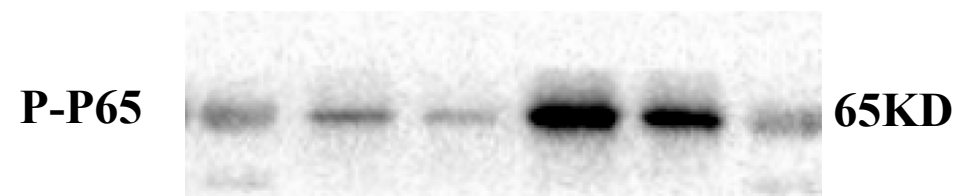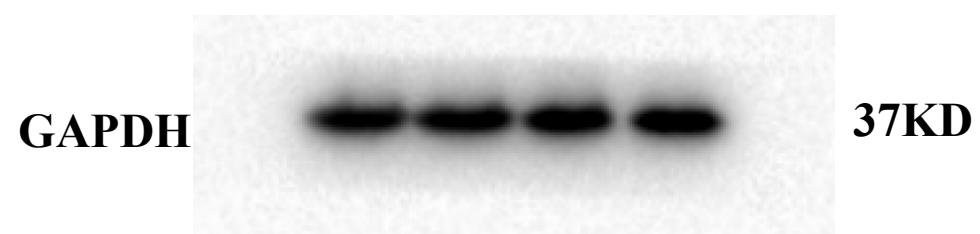

|              |   |   |   |   |
|--------------|---|---|---|---|
| NC           | + | - | + | - |
| siZBP1       | - | + | - | + |
| IL-1 $\beta$ | - | - | + | + |

**B**

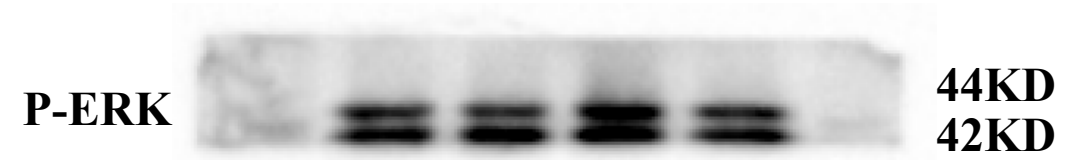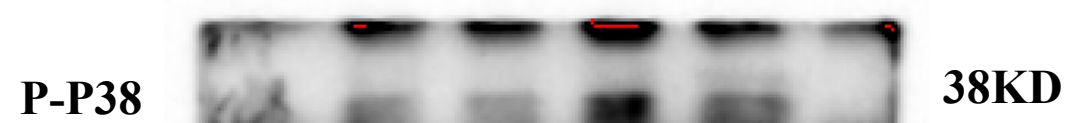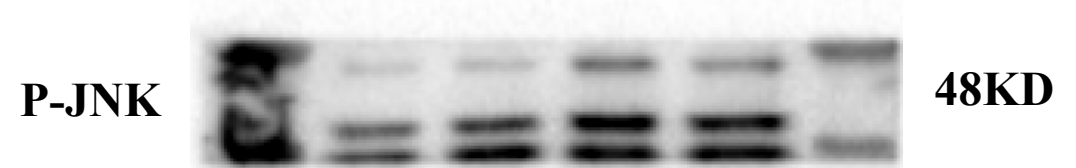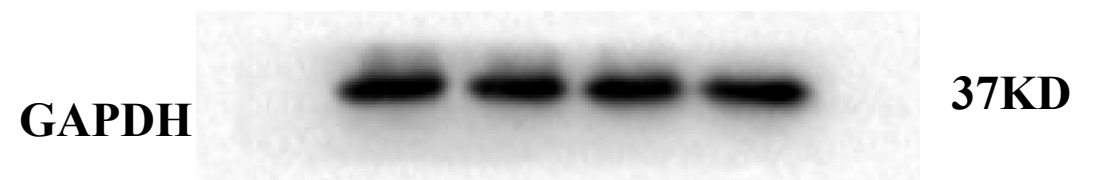

|              |   |   |   |   |
|--------------|---|---|---|---|
| NC           | + | - | + | - |
| siZBP1       | - | + | - | + |
| IL-1 $\beta$ | - | - | + | + |
